# Supplementary material
Source: PubMed Central journal article supplement (PMC7669598)
Supplement: NIHMS1610320-supplement-Supplement.pdf [file NIHMS1610320-supplement-Supplement.pdf]

**Table(s)**

**Table 1.** Characteristics of patients with malignant cutaneous mucoepidermoid carcinoma.

| Characteristic           |                         | Value <sup>a</sup> |
|--------------------------|-------------------------|--------------------|
| Total                    |                         | n = 89             |
| Year of diagnosis, y     |                         |                    |
|                          | Mean (SD)               | 2003 (9.3)         |
|                          | Median (range)          | 2004 (1978-2016)   |
| Age, y <sup>ii</sup>     |                         |                    |
|                          | Mean (SD)               | 63.4 (17.5)        |
|                          | Median (range)          | 63 (23-94)         |
| Sex, %                   |                         |                    |
|                          | Male                    | 55.1               |
|                          | Female                  | 44.9               |
| Race, %                  |                         |                    |
|                          | White                   | 80.0               |
|                          | Non-white               | 20.0               |
| Residency demographic    |                         |                    |
|                          | Urban                   | 33.0               |
|                          | Metro                   | 42.0               |
|                          | Non-metro               | 25.0               |
| Stage at presentation, % |                         |                    |
|                          | Stage I (Local)         | 68.6               |
|                          | Stage II/III (Regional) | 24.3               |
|                          | Stage IV (Distant)      | 7.2                |
| Grade at presentation, % |                         |                    |
|                          | Low Grade               | 75.5               |
|                          | High Grade              | 24.5               |
| Body site, %             |                         |                    |
|                          | Face                    | 84.3               |
|                          | Trunk or Extremities    | 15.7               |
| Surgery, %               |                         |                    |
|                          | Yes                     | 81.8               |
|                          | No                      | 18.2               |

<sup>a</sup> Percentages may not total 100% because of rounding and missing indicator variables for unknown variables (not included in table).

**Table 2.** Survival data by tumor stage.

| Survival                     |         |                         | Overall    | Disease-Specific |
|------------------------------|---------|-------------------------|------------|------------------|
| Median (SE) <sup>a</sup> , y |         |                         | 12.1 (1.3) | 21.5 (1.1)       |
|                              |         | Stage                   |            |                  |
|                              |         | Stage I (Local)         | 20.8 (1.6) | 21.6 (1.3)       |
|                              |         | Stage II/III (Regional) | 9.3 (2.0)  | 16.4 (2.0)       |
|                              |         | Stage IV (Distant)      | 3.2 (0.8)  | -- <sup>a</sup>  |
|                              |         | Grade                   |            |                  |
|                              |         | Low Grade               | 17.0 (1.6) | 21.5 (1.6)       |
|                              |         | High Grade              | 3.1 (0.7)  | 5.8 (0.8)        |
| Proportion, %                |         |                         |            |                  |
|                              | At 1 y  |                         | 85.0%      | 90.4%            |
|                              | At 5 y  |                         | 68.2%      | 76.0%            |
|                              | At 10 y |                         | 54.9%      | 68.4%            |

Abbreviation: SE, standard error.

<sup>a</sup> Unable to calculate quartile estimate and SE using a 95% CI for this cell.
